# Supplementary material for: Development of a novel prediction method of cis-elements to hypothesize collaborative functions of cis-element pairs in iron-deficient rice
Source: PubMed Central journal article supplement (PMC4883709; doi:10.1186/1939-8433-6-22), 2013-09-22
Supplement: 12284_2013_62_MOESM2_ESM.pdf [file 12284_2013_62_MOESM2_ESM.pdf]

## About MAMA score

The MAMA score was calculated from gene expression and sequence similarities. The following examples will help clarify how this score is related to gene expression and sequence similarities.

### How to calculate MAMA score

CR: Cover ratio

CR =  $N(x|y)/N(y)$   $N(x|y)$ : number of genes that have  $x$  bp of identical sequence to a candidate sequence and upregulated  $y$ -folds

$N(y)$ : number of genes upregulated  $y$ -folds

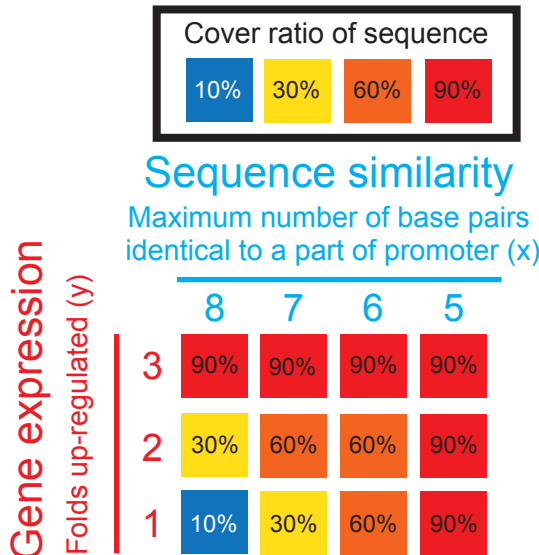

$$\text{*MAMA score} = \frac{\sum(\text{CR} \cdot x \cdot y)}{\sum(\text{CR} \cdot x)}$$

\* In the paper,  $x$  was replaced with  $h\_score$ ,  $y$  was replaced with  $r\_score$ , and each gene (1/1) was used instead of the cover ratio.

$$\begin{aligned} & \{(0.9 \cdot 8 \cdot 3) + (0.9 \cdot 7 \cdot 3) + (0.9 \cdot 6 \cdot 3) + (0.9 \cdot 5 \cdot 3) \\ & + (0.3 \cdot 8 \cdot 2) + (0.6 \cdot 7 \cdot 2) + (0.6 \cdot 6 \cdot 2) + (0.9 \cdot 5 \cdot 2) \\ & + (0.1 \cdot 8 \cdot 1) + (0.3 \cdot 7 \cdot 1) + (0.6 \cdot 6 \cdot 1) + (0.9 \cdot 5 \cdot 1)\} \\ & / \{(0.9 \cdot 8) + (0.9 \cdot 7) + (0.9 \cdot 6) + (0.9 \cdot 5) \\ & + (0.3 \cdot 8) + (0.6 \cdot 7) + (0.6 \cdot 6) + (0.9 \cdot 5) \\ & + (0.1 \cdot 8) + (0.3 \cdot 7) + (0.6 \cdot 6) + (0.9 \cdot 5)\} = 2.25 \end{aligned}$$

### MAMA score and examples

|                                                                                                                                                                                                                                                                                                                       | Score | Exsample |     |     |     |     |     |     |     |     |     |     |      |                                                                                                                                                                                                                                  |
|-----------------------------------------------------------------------------------------------------------------------------------------------------------------------------------------------------------------------------------------------------------------------------------------------------------------------|-------|----------|-----|-----|-----|-----|-----|-----|-----|-----|-----|-----|------|----------------------------------------------------------------------------------------------------------------------------------------------------------------------------------------------------------------------------------|
| Candidate sequence A<br> <table border="1"> <tr><td>90%</td><td>90%</td><td>90%</td><td>90%</td></tr> <tr><td>90%</td><td>90%</td><td>90%</td><td>90%</td></tr> <tr><td>90%</td><td>90%</td><td>90%</td><td>90%</td></tr> </table> | 90%   | 90%      | 90% | 90% | 90% | 90% | 90% | 90% | 90% | 90% | 90% | 90% | 2.0  | Common sequence                                                                                                                                                                                                                  |
| 90%                                                                                                                                                                                                                                                                                                                   | 90%   | 90%      | 90% |     |     |     |     |     |     |     |     |     |      |                                                                                                                                                                                                                                  |
| 90%                                                                                                                                                                                                                                                                                                                   | 90%   | 90%      | 90% |     |     |     |     |     |     |     |     |     |      |                                                                                                                                                                                                                                  |
| 90%                                                                                                                                                                                                                                                                                                                   | 90%   | 90%      | 90% |     |     |     |     |     |     |     |     |     |      |                                                                                                                                                                                                                                  |
| Candidate sequence B<br> <table border="1"> <tr><td>10%</td><td>30%</td><td>60%</td><td>90%</td></tr> <tr><td>10%</td><td>30%</td><td>60%</td><td>90%</td></tr> <tr><td>10%</td><td>30%</td><td>60%</td><td>90%</td></tr> </table> | 10%   | 30%      | 60% | 90% | 10% | 30% | 60% | 90% | 10% | 30% | 60% | 90% | 2.0  | Completely at random<br>Sequences 8 bp identical are rare<br>Sequences 5 bp identical are common                                                                                                                                 |
| 10%                                                                                                                                                                                                                                                                                                                   | 30%   | 60%      | 90% |     |     |     |     |     |     |     |     |     |      |                                                                                                                                                                                                                                  |
| 10%                                                                                                                                                                                                                                                                                                                   | 30%   | 60%      | 90% |     |     |     |     |     |     |     |     |     |      |                                                                                                                                                                                                                                  |
| 10%                                                                                                                                                                                                                                                                                                                   | 30%   | 60%      | 90% |     |     |     |     |     |     |     |     |     |      |                                                                                                                                                                                                                                  |
| Candidate sequence C<br> <table border="1"> <tr><td>30%</td><td>30%</td><td>60%</td><td>90%</td></tr> <tr><td>10%</td><td>30%</td><td>60%</td><td>90%</td></tr> <tr><td>10%</td><td>30%</td><td>60%</td><td>90%</td></tr> </table> | 30%   | 30%      | 60% | 90% | 10% | 30% | 60% | 90% | 10% | 30% | 60% | 90% | 2.05 | 8 bp identical sequence<br>is enriched in genes upregulated threefold<br>when it is compared from that of onefold                                                                                                                |
| 30%                                                                                                                                                                                                                                                                                                                   | 30%   | 60%      | 90% |     |     |     |     |     |     |     |     |     |      |                                                                                                                                                                                                                                  |
| 10%                                                                                                                                                                                                                                                                                                                   | 30%   | 60%      | 90% |     |     |     |     |     |     |     |     |     |      |                                                                                                                                                                                                                                  |
| 10%                                                                                                                                                                                                                                                                                                                   | 30%   | 60%      | 90% |     |     |     |     |     |     |     |     |     |      |                                                                                                                                                                                                                                  |
| Candidate sequence D<br> <table border="1"> <tr><td>30%</td><td>60%</td><td>60%</td><td>60%</td></tr> <tr><td>10%</td><td>30%</td><td>30%</td><td>60%</td></tr> <tr><td>10%</td><td>10%</td><td>30%</td><td>60%</td></tr> </table> | 30%   | 60%      | 60% | 60% | 10% | 30% | 30% | 60% | 10% | 10% | 30% | 60% | 2.25 | 8 bp identical sequence<br>is enriched in genes upregulated threefold<br>7 bp identical sequence<br>is enriched in genes upregulated two- and threefold<br>6 bp identical sequence<br>is enriched in genes upregulated threefold |
| 30%                                                                                                                                                                                                                                                                                                                   | 60%   | 60%      | 60% |     |     |     |     |     |     |     |     |     |      |                                                                                                                                                                                                                                  |
| 10%                                                                                                                                                                                                                                                                                                                   | 30%   | 30%      | 60% |     |     |     |     |     |     |     |     |     |      |                                                                                                                                                                                                                                  |
| 10%                                                                                                                                                                                                                                                                                                                   | 10%   | 30%      | 60% |     |     |     |     |     |     |     |     |     |      |                                                                                                                                                                                                                                  |

MAMA scores become higher if identical sequences are enriched in upregulated genes.
