# Supplementary material for: Development of a novel prediction method of cis-elements to hypothesize collaborative functions of cis-element pairs in iron-deficient rice
Source: PubMed Central journal article supplement (PMC4883709; doi:10.1186/1939-8433-6-22), 2013-09-22
Supplement: 12284_2013_62_MOESM9_ESM.pdf [file 12284_2013_62_MOESM9_ESM.pdf]

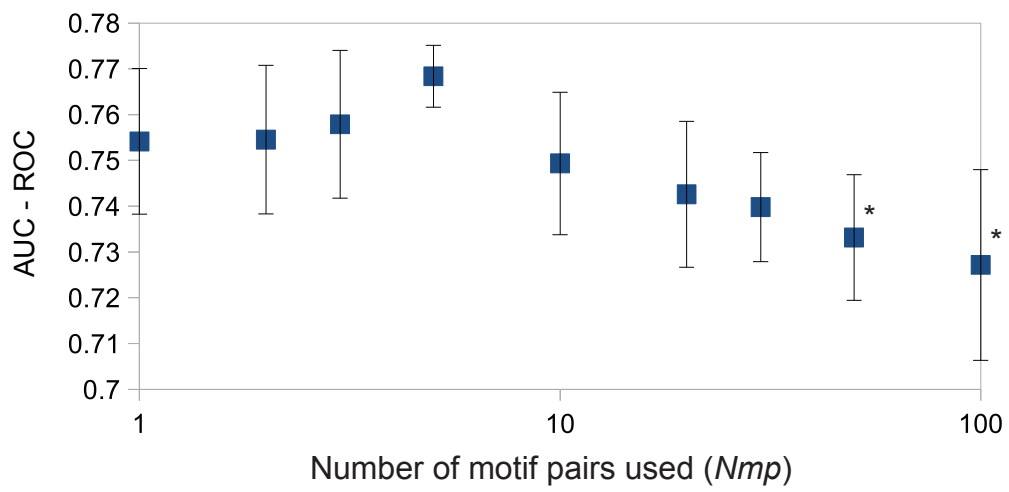

## Takei et al. Additional file 7

Additional file 7. Number of motif pairs used ( $Nmp$ ) and the value of AUC-ROC. \*  $P$  value < 0.05 by student-t test. AUC-ROC of ten runs with motif pairs were compared from that without motif pairs.  $n=10$ . mean  $\pm$  S.D.
