# Supplementary material for: Development of a novel prediction method of cis-elements to hypothesize collaborative functions of cis-element pairs in iron-deficient rice
Source: PubMed Central journal article supplement (PMC4883709; doi:10.1186/1939-8433-6-22), 2013-09-22

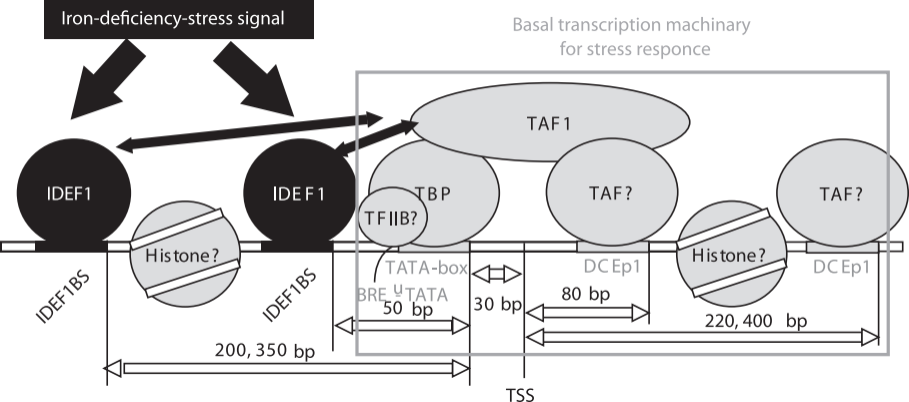

Supplement: 12284_2013_62_MOESM16_ESM.pdf [file 12284_2013_62_MOESM16_ESM.pdf]
